# Supplementary material
Source: ML conference proceedings conference paper supplement (https://proceedings.neurips.cc/paper_files/paper/2015/hash/20b5e1cf8694af7a3c1ba4a87f073021-Abstract.html)
Supplement: Supplementary file [file 20b5e1cf8694af7a3c1ba4a87f073021-Supplemental.zip]

---

# Supplementary Material

## Probabilistic Curve Learning: Coulomb Repulsion and the Electrostatic Gaussian Process

---

**Ye Wang**  
 Department of Statistics  
 Duke University  
 Durham, NC, USA, 27705  
 eric.ye.wang@duke.edu

**David Dunson**  
 Department of Statistics  
 Duke University  
 Durham, NC, USA, 27705  
 dunson@stat.duke.edu

### Proof of Lemma 1 and Lemma 2

In this section we let  $X_t, t \in \mathbb{N}_+$  denote a realization from Corp.

**Lemma 1.** *For any  $n \in \mathbb{N}_+$ , any  $1 \leq i < n$  and any  $\epsilon > 0$ , we have*

$$p(X_n \in \mathcal{B}(X_i, \epsilon) | X_1, \dots, X_{n-1}) < \frac{2\pi^2 \epsilon^{2r+1}}{2r+1}$$

where  $\mathcal{B}(X_i, \epsilon) = \{X \in (0, 1) : d(X, X_i) < \epsilon\}$ .

*Proof.* By definition of the Corp, for  $\epsilon$  small enough, we have

$$\begin{aligned} & p(X_n \in \mathcal{B}(X_i, \epsilon) | X_1, \dots, X_{n-1}) \\ &= C \int_{\sin(X_n - X_i) < \epsilon} \prod_{j=1}^{n-1} \sin^{2r}(\pi X_n - \pi X_j) dX_n \\ &\approx C \int_{|X_n - X_i| < \epsilon} \prod_{j=1}^{n-1} \sin^{2r}(\pi X_n - \pi X_j) dX_n, \end{aligned}$$

where  $C$  is the normalizing constant. When  $X_i \in (\epsilon, 1 - \epsilon)$ , the following is true,

$$\begin{aligned} & \int_{X_i - \epsilon}^{X_i + \epsilon} \prod_{j=1}^{n-1} \sin^{2r}(\pi X_n - \pi X_j) dX_n \\ &\leq \int_{X_i - \epsilon}^{X_i + \epsilon} \sin^{2r}(\pi X_n - \pi X_i) dX_n \\ &= 2 \int_0^\epsilon \sin^{2r}(\pi x) dx \\ &< 2 \int_0^\epsilon x^{2r} dx \\ &= \frac{2\pi^2 \epsilon^{2r+1}}{2r+1}. \end{aligned}$$

When  $X_i \in (0, \epsilon)$ , the following is true,

$$\begin{aligned}
& \left( \int_0^{X_i+\epsilon} + \int_{1-\epsilon+X_i}^1 \right) \prod_{j=1}^{n-1} \sin^{2r}(\pi X_n - \pi X_j) dX_n \\
& \leq \int_0^{X_i+\epsilon} \sin^{2r}(\pi X_n - \pi X_i) dX_n + \int_{1-\epsilon+X_i}^1 \sin^2(\pi - \pi X_n + \pi X_i) dX_n \\
& = \left( \int_0^\epsilon + \int_0^{X_i} \right) \sin^{2r}(\pi x) dx + \int_{X_i}^\epsilon \sin^{2r}(\pi x) dx \\
& < \frac{2\pi^2 \epsilon^{2r+1}}{2r+1}
\end{aligned}$$

The proof for  $X_i \in (1 - \epsilon, 1)$  is the same as above and hence is neglected here.  $\square$

**Lemma 2.** For any  $n \in \mathbb{N}_+$ ,  $p(X_{t_1}, \dots, X_{t_k})$  (due to the exchangeability, we can assume  $X_1 < X_2 < \dots < X_n$  without loss of generality) is maximized when and only when

$$d(X_i, X_{i-1}) = \sin\left(\frac{1}{n+1}\right) \text{ for all } 2 \leq i \leq n. \quad (1)$$

*Proof.* The log of the density is given up to a constant by

$$l(X_1, \dots, X_n) \propto \sum_{i>j} c \log \left[ \sin^2(\pi X_i - \pi X_j) \right].$$

The first order derivatives are given by

$$\begin{aligned}
\frac{\partial l}{\partial X_i} &= \sum_{j \neq i}^n \frac{2c\pi \sin(\pi X_i - \pi X_j) \cos(\pi X_i - \pi X_j)}{\sin^2(\pi X_i - \pi X_j)} \\
&= \sum_{j \neq i}^n 2c\pi \cot(\pi X_i - \pi X_j)
\end{aligned} \quad (2)$$

For any  $X_1 < X_2 < \dots < X_n$  satisfying condition  $d(X_i, X_{i-1}) = \sin\left(\frac{1}{n+1}\right)$ , (2) can be rewritten as

$$\begin{aligned}
& \sum_{j \neq i}^n 2c\pi \cot(\pi X_i - \pi X_j) \\
&= \sum_{j \neq i}^n 2c\pi \cot\left(\frac{i-j}{n}\pi\right) \\
&= \sum_{j=1}^{i-1} 2c\pi \cot\left(\frac{j}{n}\pi\right) + \sum_{j=i+1}^n 2c\pi \cot\left(-\frac{j-i}{n}\pi\right) \\
&= \sum_{j=1}^{i-1} 2c\pi \cot\left(\frac{j}{n}\pi\right) + \sum_{j=i+1}^n 2c\pi \cot\left(\frac{n-j+i}{n}\pi\right) \\
&= \sum_{j=1}^{n-1} 2c\pi \cot\left(\frac{j}{n}\pi\right) \\
&= 0
\end{aligned}$$

Hence (1) satisfies the first order condition. The second order derivatives are given by

$$\frac{\partial^2 l}{\partial X_i \partial X_j} = 2c\pi \frac{\partial \left[ \cot(\pi X_i - \pi X_j) \right]}{\partial X_j}$$

for  $i \neq j$  and

$$\begin{aligned}\frac{\partial^2 l}{\partial X_i^2} &= \sum_{j \neq i}^n 2c\pi \frac{\partial \left[ \cot(\pi X_i - \pi X_j) \right]}{\partial X_j} \\ &= \sum_{j \neq i}^n \frac{\partial^2 l}{\partial X_i \partial X_j}\end{aligned}$$

Hence the Hessian matrix is positive semi-definite, indicating that (1) is a global maxima. Note also that the Hessian matrix is rank-deficit, indicating that the solution to this maximization problem is not unique.  $\square$

## Sampling from Corp

The sampling method can be easily summarized as,

Step 1 Sample  $X_1$  from  $\text{Unif}(0,1)$ ;

Step 2 Repeatedly sample  $X_i$  from  $p(X_i|X_1, \dots, X_{i-1})$  until desired sample size reached.

The difficulty arises in step 2 since

$$p(X_i|X_1, \dots, X_{i-1}) \propto \prod_{j=1}^{i-1} \sin^{2r}(\pi X_i - \pi X_j) \mathbb{1}_{X_i \in (0,1)}$$

is multi-modal and not analytically integrable. Fortunately, sampling from the above univariate distribution can be done by rejection sampling. The only trick here is to find a proper proposal distribution. Naïvely using a uniform would result in very high rejection rate as  $i$  grows larger.

Assuming without loss of generality that  $X_1 < X_2 < \dots < X_{i-1}$ , it can be easily checked that there is one local mode within each interval of  $(X_j, X_{j+1})$ , for  $1 \leq j \leq i-2$ . We denote the mode by  $p_j$  and the interval by  $S_j$ . There is also one mode on  $(0, X_1) \cup (X_{i-1}, 1)$ . We denote this mode by  $p_{i-1}$ , and this interval by  $S_{i-1}$ . Sampling from this conditional distribution can be summarized as,

Step 1 Sample  $k$  from  $\text{Multinomial}_i(\mathbf{a})$  where  $a_j = \int_{S_j} p(X_i|X_1, \dots, X_{i-1}) dX_i$  for  $j = 1, \dots, i-1$ . These integration is done using numerical method;

Step 2 Use  $\text{Unif}(S_k)$  as the proposal distribution and calculate  $p_k$  using numerical maximization method. Use rejection sampling to sample  $X_i$  from the truncated conditional distribution  $p_{S_k}(X_i|X_1, \dots, X_{i-1})$ .

## Prediction

Assume  $m$  new data  $\mathbf{z}_i$ , for  $i = 1, \dots, m$ , are partially observed and the missing entries are to be predicted. Letting  $\mathbf{z}_i^O$  denote the observed data vector and  $\mathbf{z}_i^M$  denote the missing part. We approximate the predictive distribution by assuming that these  $\mathbf{z}_i$ 's are conditionally independent. For ease of notation, we focus on discussing the prediction algorithm for one partially observed new data vector  $(\mathbf{z}^O, \mathbf{z}^M)$ .

**Sample from the posterior predictive distribution** Instead of sampling from  $p(\mathbf{z}^M|\mathbf{z}^O, \hat{\mathbf{x}}, \mathbf{y}_{1:n}, \hat{\Theta})$ , we sample from  $p(\mathbf{z}^M, x^z|\mathbf{z}^O, \hat{\mathbf{x}}, \mathbf{y}_{1:n}, \hat{\Theta})$ , which can be factorized into two parts  $p(\mathbf{z}^M|x^z, \mathbf{z}^O, \hat{\mathbf{x}}, \mathbf{y}_{1:n}, \hat{\Theta})$  and  $p(x^z|\mathbf{z}^O, \hat{\mathbf{x}}, \mathbf{y}_{1:n}, \hat{\Theta})$ . The first part is simply a conditional Gaussian distribution and can be easily sampled. We use the Metropolis Hasting algorithm to sample from the intractable second part, using  $\text{Unif}(0,1)$  as the proposal distribution. Note that  $\text{Unif}(0,1)$  is a natural choice, since it is the prior distribution of  $x$ . It can be easily generalized to a piecewise uniform distribution, as what we did in sampling Corp, to decrease the rejection rate.

**Find the MAP** MCMC can be infeasible in some applications due to its expensive computation. A straightforward solution is to use EM algorithm treating  $x^z$  as an augmented variable, which will give us a point estimate of  $\mathbf{z}^M$ . We propose another heuristic algorithm that would give us instead of point estimate a distribution of  $\mathbf{z}^M$ . The algorithm is very simple and is summarized as follows,

Step 1. Find  $\hat{x}^z$  by maximizing  $p(x^z | \mathbf{z}^O, \hat{\mathbf{x}}, \mathbf{y}_{1:n}, \hat{\Theta})$ ;

Step 2. Return  $p(\mathbf{z}^M | \hat{x}^z, \mathbf{z}^O, \hat{\mathbf{x}}, \mathbf{y}_{1:n}, \hat{\Theta})$ , which is simply a multivariate Gaussian.

## Simulation Results

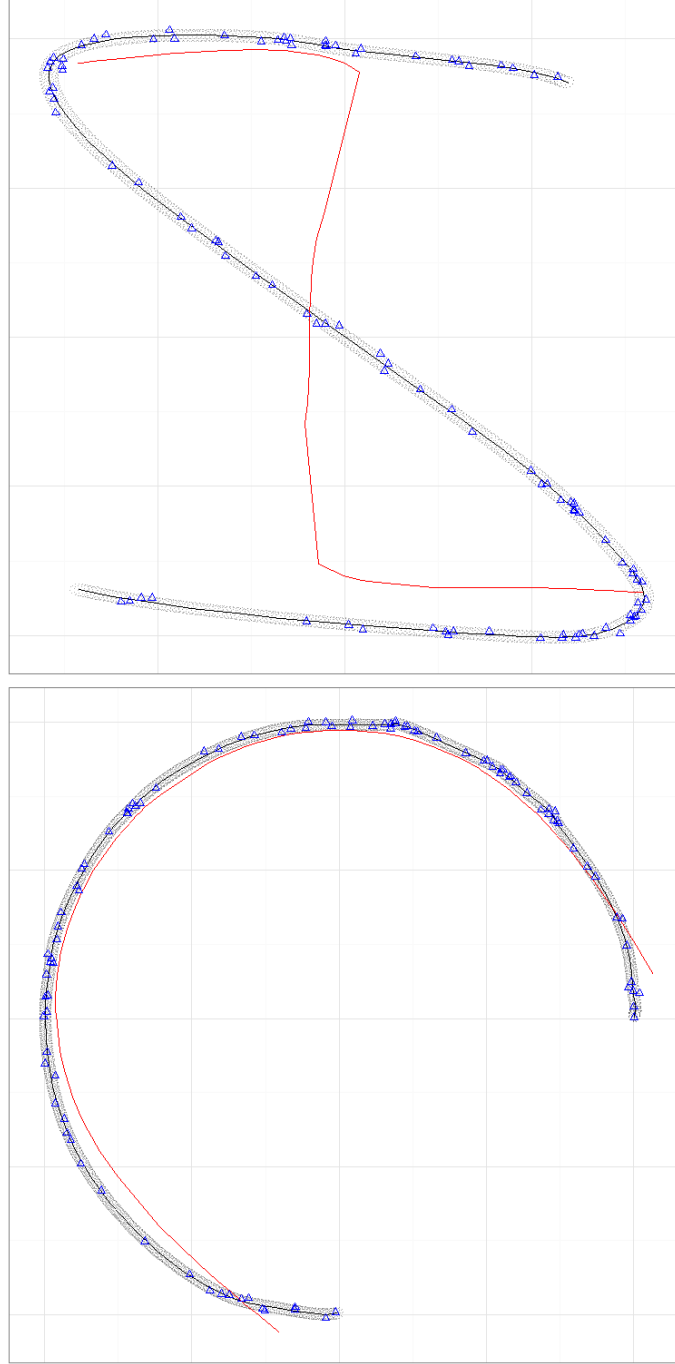

Figure 1: Visualization of two simulation experiments where the data (triangles) are simulated from a rotated sine curve with Gaussian noises (**top**), an arc with Gaussian noises (**bottom**). The dotted shading denotes the 95% posterior predictive uncertainty band of  $(y_1, y_2)$  under electroGP. The black curve denotes the posterior mean curve under electroGP and the red curve denotes the P-curve.
